1 **Basis for the phototaxis sign reversal in the green alga *Chlamydomonas reinhardtii***  
2 **studied by high-speed observation**

3  
4 **Masako Nakajima<sup>1,2†</sup> Kosuke Iizuka<sup>3†</sup>, Noriko Ueki<sup>4</sup>, Atsuko Isu<sup>1</sup>,**  
5 **Kenjiro Yoshimura<sup>5</sup>, Toshiyuki Nakagaki<sup>3</sup>, Toru Hisabori<sup>1,2,6</sup>, Katsuhiko Sato<sup>3\*</sup>,**  
6 **and Ken-ichi Wakabayashi<sup>1,2,6\*</sup>**

7 1: Laboratory for Chemistry and Life Science, Institute of Innovative Research, Tokyo

8 Institute of Technology, Yokohama, 226-8503 Japan

9 2: Department of Environmental Chemistry and Engineering, Interdisciplinary Graduate

10 School of Science and Engineering, Tokyo Institute of Technology, Yokohama,

11 226-8503 Japan

12 3: Research Institute for Electronic Science (RIES), Hokkaido University, Sapporo

13 001-0020, Japan

14 4: Science Research Center, Hosei University, 2-17-1 Fujimi, Chiyoda-ku, Tokyo

15 102-8160, JAPAN

16 5: Department of Machinery and Control Systems, College of Systems Engineering and

17 Science, Shibaura Institute of Technology, Saitama 337-8570, Japan

18 6: School of Life Science and Technology, Tokyo Institute of Technology, Yokohama,

19 226-8503 Japan

20

21 †: These authors contributed equally to this work.

22 \*: To whom correspondence should be addressed: KW, [wakaba@res.titech.ac.jp](mailto:wakaba@res.titech.ac.jp); KS,

23 [katsuhiko\\_sato@es.hokudai.ac.jp](mailto:katsuhiko_sato@es.hokudai.ac.jp)

24

25 **ABSTRACT**

26 For organisms that respond to environmental stimuli using taxes, reversal of the tactic  
27 sign should be tightly regulated for survival. The biciliate green alga *Chlamydomonas*  
28 *reinhardtii* is an excellent model for studying reversal between positive and negative  
29 phototaxis. *C. reinhardtii* cells change swimming direction by modulating the balance  
30 of beating forces between their two cilia after photoreception at the eyespot; however, it  
31 remains unknown how they reverse phototactic sign. In this study, we observed cells  
32 undergoing phototactic turns with a high-speed camera and found that two key factors  
33 determine the phototactic sign: which of the two cilia beats stronger for phototactic  
34 turning and when the strong beating starts. We developed a mathematical model to  
35 explain this sign-reversal with a single equation, which suggests that the timing of the  
36 strong ciliary beating is regulated by switching between the light-on and light-off  
37 responses at the eyespot.

38

39 **Keywords:**

40 *Chlamydomonas reinhardtii*, phototaxis, flagella/cilia, ROS, mathematical model

41

## 42 INTRODUCTION

43 The biciliate unicellular green alga *Chlamydomonas reinhardtii* is an excellent model  
44 organism to study how organisms respond to changing light conditions. *C. reinhardtii*  
45 shows a distinct light-induced behavior known as phototaxis, in which cells swim either  
46 toward or away from a light source (in positive or negative phototaxis, respectively).  
47 The direction of phototaxis, referred to here as the sign (either positive or negative), can  
48 be switched. The regulation of this sign reversal is thought to be important for the  
49 viability of photosynthetic algae, but its mechanism is not well understood.

50 In *C. reinhardtii*, the light signal for phototaxis is received by the eyespot  
51 (Foster & Smyth, 1980), an organelle that appears under a microscope as an orange spot  
52 near the cell equator. It consists of carotenoid-rich granule layers, and a small area of  
53 plasma membrane in which channelrhodopsin (ChR) molecules are localized (Fig. 1A).  
54 The carotenoid-rich granule layers (CLs) function as a quarter-wave plate that reflects  
55 light (Foster & Smyth, 1980; Ueki et al., 2016), while ChR molecules are light-gated  
56 ion channels (Nagel et al., 2002; Nagel et al., 2003; Oleg A. Sineshchekov, Jung, &  
57 Spudich, 2002; Suzuki et al., 2003). Because of the relative position of these two  
58 components, the eyespot perceives light with high directionality. When a light signal  
59 arrives from the ChR-facing side, the light signal is amplified by reflection from the

60 CLs; conversely, light signals are blocked by the CLs when coming from the CL-facing  
61 direction. In addition, while swimming, the cell rotates around its anterior-posterior axis.  
62 Directional photoreception by cells that swim with bodily rotation enables them to  
63 accurately detect and move in the direction of light stimuli.

64 Previous studies suggest that the phototaxis pathway in *C. reinhardtii* consists  
65 of: 1) photoreception by ChRs, 2) an increase in intraciliary  $[Ca^{2+}]$ , and 3) a change in  
66 the balance of beating between the two cilia – after photoreception, the forces generated  
67 by the two cilia of *C. reinhardtii* become imbalanced, changing the cell's swimming  
68 direction. These two cilia can be distinguished by their position relative to the eyespot,  
69 with the one nearest the eyespot called the *cis*-cilium, and the other called the  
70 *trans*-cilium. A currently prevailing model explains the mechanism underlying positive  
71 phototaxis as follows: When the eyespot faces a light source during swimming with  
72 bodily rotation, ChRs open to allow for  $Ca^{2+}$  entry, intraciliary  $[Ca^{2+}]$  increases, and the  
73 *trans*-cilium starts to beat more strongly than the *cis*-cilium, by increasing beating  
74 amplitude and/or frequency (Ritsu Kamiya & Witman, 1984; Ruffer & Nultsch, 1991).  
75 The imbalance between the forces generated by the two cilia tilts the cell's swimming  
76 direction toward the eyespot-bearing side (i.e., in the direction of the light source). After  
77  $180^\circ$  of rotation, the eyespot stops receiving light due to the shielding of CLs, the ChRs

78 close, intraciliary  $[Ca^{2+}]_i$  decreases due to some ion pumping activity, and the force  
79 generated by the *cis*-cilium increases while that of the *trans*-cilium decreases, resulting  
80 in the cell's swimming direction tilting toward the light-source. By repeating this  
81 process, the cell will swim toward the light source, displaying positive phototaxis (Fig.  
82 1B). However, in contrast to this widespread model, phototactic turns may also be  
83 initiated when the eyespot faces away from the light source (i.e., when the eyespot is  
84 shaded) (Isogai, Kamiya, & Yoshimura, 2000).

85           How, then, can the direction of phototaxis be reversed? The following  
86 possibilities exist: (i) The *cis*-cilium, rather than the *trans*-cilium, beats stronger when  
87  $[Ca^{2+}]_i$  increases upon photoreception; (ii) A light-off stimulus on the eyespot, rather  
88 than a light-on stimulus, activates the dominant *trans*-cilium; (iii) The response of cilia  
89 to a light-on stimulus on the eyespot is delayed; or (iv)  $[Ca^{2+}]_i$  actually decreases upon  
90 photoreception, rather than increasing. Among these possibilities, (iv) must be tested  
91 using highly sensitive  $Ca^{2+}$  indicators, because the  $[Ca^{2+}]_i$  regulating the beating of cilia  
92 during phototaxis is thought to be at submicromolar levels (Ritsu Kamiya & Witman,  
93 1984), while (i) to (iii) can be tested by observing cell behavior after light stimulation.

94           Indeed, several factors are known to induce sign-switching of phototaxis in *C.*  
95 *reinhardtii*, including both extracellular factors like light intensity (Feinleib & Curry,

96 1971) and extracellular  $\text{Ca}^{2+}$  concentration (Morel-Laurens, 1987), and intracellular  
97 factors such as circadian rhythms (Kondo, Johnson, & Hastings, 1991), photosynthetic  
98 activities (Takahashi & Watanabe, 1993), and the amount of reactive oxygen species  
99 (ROS) (Wakabayashi, Misawa, Mochiji, & Kamiya, 2011). The amount of cellular ROS  
100 can be readily changed by applying membrane-permeable ROS reagents or  
101 membrane-permeable ROS scavengers to cells, which strongly bias the phototactic sign:  
102 cells show positive phototaxis after treatment with ROS and negative phototaxis after  
103 treatment with ROS-scavengers (Wakabayashi et al., 2011).

104           In this study, to test the possibilities (i) to (iii) above, we carried out  
105 high-speed observations of cells turning during positive or negative phototaxis, after  
106 treatment with either a membrane-permeable ROS or a membrane-permeable ROS  
107 scavenger (hereinafter referred to as “ROS-modulating reagents”). Our results support  
108 both possibilities (i) and (ii) described above. In support of (i), after photoreception, we  
109 observed that positively phototactic cells beat the *trans*-cilium more strongly, whereas  
110 negatively phototactic cells beat the *cis*-cilium more strongly. We also developed a  
111 mathematical model that can explain the phototactic-sign reversal based on the change  
112 in timing at which ciliary dominance takes place after photo-stimulation. In support of  
113 (ii), treatment with the ROS-modulating reagents was found to induce a light-off

114 response, which switched the phototactic sign. While it was impossible to distinguish  
115 between possibilities (ii) (light-off response) and (iii) (delay of light-on response)  
116 through microscopic observation of the wild-type cells alone, our observations of  
117 slow-swimming mutants, along with the results of our mathematical model, strongly  
118 support possibility (ii).  
119



120 **RESULTS**

121 **Two hypotheses to explain the sign change of phototaxis**

122 The mechanism underlying positive phototaxis can be explained as described in the  
123 Introduction (shown in Fig. 1B). To elucidate the mechanism of negative phototaxis, we  
124 considered two models (Fig. 1C), in which the dominant cilium is a key factor (defined  
125 here as the cilium that begins to beat more strongly after photoreception than the other).  
126 In the first model (the dominant-arm model), we assume that the relationship between  
127 the dominant cilium and  $[Ca^{2+}]_i$  is reversed, such that the *cis*-cilium, rather than the  
128 *trans*-cilium, becomes dominant when  $[Ca^{2+}]_i$  is increased. If the *cis*-cilium beats more  
129 strongly than the *trans*-cilium after light perception (which elicits  $Ca^{2+}$  influx), the cell  
130 will undergo negative phototaxis. In the second model (the off-response model), we  
131 assume that the relationship between the dominant cilium and  $[Ca^{2+}]_i$  remains the same,  
132 but the onset of ciliary dominance (along with  $[Ca^{2+}]_i$  increase) occurs when the eyespot  
133 faces away from the light source, and senses a light-off stimulus. In this case, the cell  
134 will also show negative phototaxis.

135

136 **Dominant cilia differ in strains with opposite phototactic signs**

137 To determine which of these two models was more plausible, we observed the turning  
138 of *C. reinhardtii* cells using a high-speed camera (150 fps) linked to green  
139 light-emitting diode (LED) illumination sources at right angles. This system was an  
140 extension of the right-angle illumination system originally designed for the previous  
141 study (Isogai et al., 2000), which we here improved upon to observe the phototactic  
142 turnings and the eyespot position simultaneously by synchronizing the high-speed  
143 camera and the LED illumination. This allowed us to determine the exact time when a  
144 light stimulus was applied to a rotating cell, and the simultaneous orientation of the  
145 eyespot (visible as a bright spot under a dark-field microscope with an oil-immersion  
146 condenser). With this system, we first induced phototaxis in cells using the weaker  
147 stimulus of Light 1 (Fig. 2A). Then, the stronger Light 2 was illuminated at right angles  
148 to Light 1. When the eyespot in a swimming cell faced the light-source side of Light 2  
149 (or the light side) after its illumination, we considered the cell to have perceived the  
150 light in that time frame (Fig. 2A). Then, from the position of the eyespot and the  
151 swimming path, we assessed which cilium beat more strongly.

152 We observed the eyespot position during phototactic turning in two genetically  
153 different strains, CC-124 (a negatively phototactic strain, here referred to as NP) and  
154 CC-125 (positively phototactic strain, PP) (see Materials and Methods). We analyzed

155 only those cells that showed phototactic turnings of one full self-rotation after  
156 photoreception. We found that PP cells usually showed positive phototaxis. Similar to  
157 the PP cell after treatment with *t*-BOOH that induces positive phototaxis in Fig. 2A, a  
158 typical control PP cell changed its swimming direction immediately after it detected  
159 Light 2 (green arrow position). When turning toward the direction of the light source,  
160 more than half of the cells performed phototactic turning while the eyespot was located  
161 on the light side (i.e., the *trans*-cilium became dominant immediately after  
162 photoreception) (Fig. 2B).

163 In contrast, NP cells usually showed negative phototaxis. Similar to the NP cell  
164 after treatment with DMTU that induces negative phototaxis in Fig. 2A, a typical  
165 control NP cell changed its swimming direction immediately after it detected Light 2,  
166 similar to the PP cell. When turning against the direction of the light source, most cells  
167 performed turns while the eyespot was located on the light side, i.e. the *cis*-cilium  
168 became dominant immediately after photoreception (Fig. 2B). These observations  
169 suggest that the difference between PP and NP cells can be explained by the “Dominant  
170 arm model.” The cilium that becomes dominant after photoreception is genetically  
171 determined. Therefore, if the dominant cilium is the *trans*-cilium, the strain tends to

172 show positive phototaxis, while if it is the *cis*-cilium in another strain, it tends to show  
173 negative phototaxis.

174

### 175 **Reversal of phototactic sign by “off-response” of the dominant cilium**

176 Next, we examined the effect of reagents that change the cellular ROS, affecting the  
177 phototactic sign. After treatment with 0.2 mM *t*-BOOH, a membrane-permeable ROS  
178 reagent that induces positive phototaxis in both strains, most PP cells made phototactic  
179 turns while the eyespot was located on the light side, while most NP cells made  
180 phototactic turns while the eyespot was located on the dark side (i.e., the side opposite  
181 the light-source) (Fig. 2B). Fig. 2A shows the representative data, and the  
182 *t*-BOOH-treated NP cell changed its swimming direction after the cell made a  
183 half-self-rotation (magenta arrow). In contrast, after treatment with 75 mM DMTU, a  
184 membrane-permeable ROS scavenger that induces negative phototaxis in both strains,  
185 most PP cells made phototactic turns while the eyespot was located on the dark side,  
186 and most NP cells made phototactic turns while the eyespot was located on the light  
187 side. In Fig. 2A, the DMTU-treated PP cell changed its swimming direction after the  
188 cell made a half-self-rotation (magenta arrow).

189           Thus, the sign-reversal of phototaxis in both strains can be explained by the  
190 off-response model; i.e., *t*-BOOH induces the onset of *cis*-cilium dominance in the dark  
191 side in NP cells and DMTU induces that of *trans*-cilium dominance in the light side in  
192 PP cells. Simply put, the reversal of genetically determined phototactic signs in a given  
193 strain is achieved by reversing the eyespot position relative to the light source (the light  
194 or dark side) when its genetically determined dominant cilium starts to show stronger  
195 beating than the other after light stimulation. We found that the dominant cilium after  
196 photoreception of PP cells was always the *trans*-cilium, while that of NP was always  
197 the *cis*-cilium. In each strain, the sign-switching of phototaxis was caused by the onset  
198 of strong beating of the dominant cilium on the dark side.

199           Therefore, these phototactic turning events can be categorized into two cases  
200 for each sign of phototaxis. For cells displaying positive phototaxis: in (Positive Case 1),  
201 phototactic turning occurred while the eyespot was located on the light side. In this case,  
202 the *trans*-cilium must have become dominant in response to the light-on stimulus (such  
203 as PP cells without the ROS-reagents or with *t*-BOOH). In (Positive Case 2),  
204 phototactic turning occurred while the eyespot was located on the dark side. In this case,  
205 the *cis*-cilium must have become dominant in response to the light-off stimulus (such as  
206 NP cells with *t*-BOOH). For cells displaying negative phototaxis: in (Negative Case 1),

207 phototactic turning occurred while the eyespot was located on the light side. In this case,  
208 the *cis*-cilium must have become dominant in response to the light-on stimulus (such as  
209 NP cells without the ROS-reagents or with DMTU). In (Negative Case 2), phototactic  
210 turning occurred while the eyespot was located on the dark side. In this case, the  
211 *trans*-cilium must have become dominant in response to the light-off stimulus (such as  
212 PP cells with DMTU).

213

#### 214 **Eyespot position in the helical paths**

215 Regarding changes in the balance of beating between the two cilia during phototactic  
216 turning, we first wanted to examine the force balance in unstimulated cells. Under  
217 homogeneous light conditions, *C. reinhardtii* cells swim in a helical path, due to the  
218 imbalanced force generation of the two cilia beating in slightly skewed planes (Fig.  
219 S1A). In previous work, Isogai et al. showed that the eyespot is located on the outer  
220 edge of the helical swimming paths in ~80 percent of positively phototactic cells (Isogai  
221 et al., 2000). In contrast, for negatively phototactic cells, ~50 percent of cells swim with  
222 the eyespot facing inside, whereas ~30 percent of cells swim with the eyespot facing  
223 outside (Isogai et al., 2000). These results suggest that eyespot position in the helical  
224 swimming path is partially correlated with the phototactic sign, but the correlation is not

225 determinative. We thus investigated whether the eyespot position in the swimming  
226 paths is affected by ROS-modulating reagents. Most, but not all, cells swam with the  
227 eyespot outside the helix when they showed either positive phototaxis (Fig. S1B, Sign  
228 P). However, when cells showed negative phototaxis in the presence of DMTU,  
229 directing the eyespot inside the helix was observed almost as frequently as towards the  
230 outside (Fig. S1B, Sign N, +DMTU). Thus, we did not observe a strict correlation either  
231 between phototactic sign and eyespot position in the helical paths.

232

### 233 **Photoreceptor currents after treatment with the ROS-modulating reagents**

234 A possible explanation for how ROS-modulating reagents induce the light-off response  
235 is that those reagents delay the response of the dominant cilium by slowing the opening  
236 of photo-gated channels (ChRs). If this delay is as long as the time required for a cell to  
237 perform a half rotation (~250 msec), then the phototactic sign of the cell would reverse.  
238 To test this possibility, we measured the photoreceptor current (PRC) in a population of  
239 *C. reinhardtii* cells by the method of Sineshchekov et al. (O. A. Sineshchekov,  
240 Govorunova, Der, Keszthelyi, & Nultsch, 1992, 1994) (Fig. S2A). Treatment with  
241 *t*-BOOH did not significantly affect the magnitude of PRC produced by a single flash of  
242 light stimulation, in either PP or NP cells (Fig. S2B, C). We also measured the time

243 (delay) required for the generation of PRC after photostimulation, but detected no  
244 significant difference between the control and the *t*-BOOH-treated cells (Fig. S2B, C).  
245 In contrast, after treatment with DMTU, we found that PRC decreased, while delay time  
246 increased, in both strains (Fig. S2B, C). However, the increase in delay time was only  
247 ~1 msec. These results suggest that the light-off response is not caused by the delay in  
248 PRC generation.

249

#### 250 **Mathematical model to test the experimental data**

251 Our experimental results suggest that two factors are important for reversal of the  
252 phototactic sign in *C. reinhardtii* cells: (1) which of the two cilia becomes dominant  
253 after photoreception, and (2) when such a change in dominance takes place. To  
254 quantitatively examine these factors, we developed a simple mathematical model that  
255 describes the swimming behaviors of *C. reinhardtii*, focusing on the timing of the  
256 appearance of ciliary dominance. We also considered whether the ciliary dominance  
257 taking place on the dark side might either be caused by the light-off stimulus, or result  
258 from a delay in the light-on response with this model.

259 Our modeling framework is based on previous models of phototaxis in *C.*  
260 *reinhardtii* and the multicellular green alga *Volvox carteri* (Bennett & Golestanian,



261 2015; Drescher, Goldstein, & Tuval, 2010), which we extend by explicitly introducing a  
 262 time delay into the ciliary response after a light stimulus (see SI Appendix A for details).  
 263 We approximate the cell as a rigid ball and define the body axes of the cell as in Fig. 3A,  
 264 where  $\mathbf{a}$ ,  $\mathbf{b}$  and  $\mathbf{c}$  are unit vectors that are fixed to the body of the cell. We assume that a  
 265 cell swims with cilia forward, with a constant speed  $v_0$  in the posterior direction  $\mathbf{c}$ , i.e.,  
 266  $\mathbf{v} = v_0 \mathbf{c}$ , and rotates with the angular velocity

$$267 \quad \boldsymbol{\omega}(t) = -\omega_c^{(0)} \mathbf{c} + (\omega_a^{(0)} - p(t)) \mathbf{a}, \quad \text{---}[1]$$

268 where  $\omega_c^{(0)}$  and  $\omega_a^{(0)}$  are constants.  $p$  expresses the contribution from the change in  
 269 the behaviors of the two cilia: when the *trans*-cilium beats stronger than the *cis*-cilium,  
 270  $p$  becomes positive, and vice versa. The data in Fig. 2 indicate that the beating balance  
 271 between the two cilia changes depending on the change in the light intensity received at  
 272 the eyespot,  $I$ , with some delay time. We thus relate  $p$  and  $I$  as

$$273 \quad p(t) = \gamma_0 \frac{dI(t - \tau_0)}{dt}, \quad \text{---}[2]$$

274 where  $\gamma_0$  is a constant that takes the value +1 or -1.  $\gamma_0 = +1$  means the *trans*-cilium is  
 275 dominant (as in PP), while  $\gamma_0 = -1$  means the *cis*-cilium is dominant (as in NP).  $\tau_0$   
 276 is the delay time of the onset of the ciliary dominance after photoreception (around  
 277 30-40 msec under normal culture conditions) (Rüffer & Nultsch, 1991; Witman, 1993).

278 We consider the situation where a parallel light comes from the positive  $z$  direction (Fig.  
 279 3B), and  $I$  is given by  $I(t) = I_0 (-\mathbf{e}_{light} \cdot \mathbf{e}_{eyespot} + 1) / 2$ , where  $\mathbf{e}_{light} = (0, 0, -1)$ ,  
 280  $\mathbf{e}_{eyespot} = (\mathbf{a} + \mathbf{b}) / \sqrt{2}$  and  $I_0$  is the intensity of the light;  $\mathbf{e}_{light}$  and  $\mathbf{e}_{eyespot}$  represent the

281 direction of the incident light and the eyespot, respectively. The directions of body axes,  
282 **a**, **b**, **c**, are specified by three variables, the Euler angles  $(\theta_1, \theta_2, \theta_3)$  (Fig. 3B) (Landau,  
283 1976). This model is described by the variables  $(\theta_1, \theta_2, \theta_3)$  and the position of the cell  
284  $\mathbf{r} = (x, y, z)$  (see Appendix A), and their time evolution equations are closed in terms of  
285 the variables.

286 The model has two characteristic steady solutions (Eqs. S5 and S6): one  
287 represents positive phototaxis, where the cell swims in the positive  $z$  direction with a  
288 constant speed, drawing a right-handed spiral trajectory. The other represents negative  
289 phototaxis, where the cell swims in the opposite direction in a similar way (Fig. 3D).  
290 Thus the model intrinsically accounts for both positive and negative phototaxis states.  
291 The stability of the two states changes with the parameters involved in the relation  
292 between  $p$  and  $I$ , (i.e.,  $\gamma_0$ ,  $I_0$  and  $\tau_0$ ). To examine how these parameters  
293 determine the steady state (i.e., the final swimming direction), we conducted numerical  
294 simulations with appropriate initial conditions of  $(\theta_1, \theta_2, \theta_3, \mathbf{r})$ . The results showed that  
295 a cell with the *trans*-flagellum dominant ( $\gamma_0 = +1$ ) shows positive phototaxis when  $\tau_0$   
296  $= 0.08$  sec, and negative phototaxis when  $\tau_0 = 0.32$  sec (Fig. 3C, D). As one full rotation  
297 of the cell about **c** axis takes 0.5 sec in this simulation ( $\omega_c^{(0)} = 4\pi$ ), a  $\tau_0$  value between  
298 0 and 0.25 means that the onset of ciliary dominance occurs on the light side (when the  
299 eyespot faces the light source), whereas  $\tau_0$  between 0.25 and 0.50 means that it  
300 occurs on the dark side (when the eyespot faces opposite the light source after  
301 photostimulation). Thus, the simulation results are consistent with our experimental  
302 results of the PP strain (Fig. 2).

303 Fig. 4 shows the average velocities in the  $z$  direction (parallel to the light axis)  
304 in the steady state for various values of  $\gamma_0$ ,  $I_0$  and  $\tau_0$ . Blue dots are the states where  
305 Eq. S5 (positive phototaxis) is realized, while red dots are the states in which Eq. S6  
306 (negative phototaxis) is realized. Black dots represent states other than Eqs. S5 and S6,  
307 in which the cell does not draw a simple spiral trajectory but a complex one (Fig. S3),  
308 where  $v(t)$  oscillates. The following three properties of our model are apparent from  
309 Fig. 4: (i) When the sign of  $\gamma_0$  (representing the dominant cilium) is changed, the sign  
310 of  $\bar{v}_z$  (representing the phototactic sign) changes. (ii) When  $\tau_0$  (the delay time of the  
311 onset of ciliary dominance after photoreception) changes, the sign of  $\bar{v}_z$  also changes.  
312 (iii) When  $I_0$  (the maximum light intensity that the cell senses) increases, the blue and  
313 red dot regions decrease and the black dot regions increase. Property (i) validates the  
314 Dominant-arm model (Fig. 1C), which agrees with the previous mathematical model  
315 (Bennett & Golestanian, 2015). Property (ii) validates the Off-response model (Fig. 1C)  
316 as long as  $0.25 < \tau_0 < 0.5$ , a range that is consistent with the present study. Property (iii)  
317 indicates that the increase in  $I_0$  destabilizes Eqs. S5 and S6 (see SI Appendix B and  
318 Fig. S3 for details), implying that intense light tends to make the movement of *C.*  
319 *reinhardtii* unstable.

320

### 321 **Off-response or delayed response?**

322 In the Off-response model, ciliary dominance starts to occur on the dark side. We  
323 interpreted this as an immediate response to a light-off signal. However, it may also be a

324 delayed response to a light-on signal. If the delay time  $\tau_0$  is fixed between 0.25 sec  
325 and 0.5 sec, a delayed response to a light-on stimulus would just look like a light-off  
326 response without a delay. To assess which of these two interpretations is more plausible,  
327 we conducted an experiment and a simulation.

328         First, we observed phototaxis in slow-swimming mutants *ida4* (lacking  
329 inner-arm dynein subspecies a, c and d) and *odal* (lacking entire outer-arm dynein)  
330 after treatment with ROS-modulating reagents (R. Kamiya, 1988; R. Kamiya, Kurimoto,  
331 & Muto, 1991; Takada, Wilkerson, Wakabayashi, Kamiya, & Witman, 2002). As the  
332 bodily rotation of the cell is caused by the slightly three-dimensional beating of the two  
333 cilia, slow-swimming mutants show bodily rotation with a longer rotation cycle time, as  
334 we observed (Table 1). If the delay time is between 0.25 and 0.50 sec, those  
335 slow-swimming mutants may differ in phototactic sign from the wild-type PP and NP  
336 strains. We found that both *odal* and *ida4* cells tended to display positive phototaxis  
337 under neutral or oxidizing conditions, and negative phototaxis under reducing  
338 conditions, similarly to the PP strain of the wild type (Fig. 5). However, the  
339 sign-reversal in the slow-swimming mutants was not as clear as in the wild type,  
340 especially after treatment with the ROS-scavenger. It is possible that the force  
341 generation for steering is weaker under these conditions in the slow-swimming mutants.

342           We also used our mathematical model to simulate the behavior of cells that  
343 self-rotate at a lower-than-normal frequency of 0.67 Hz, a frequency close to that of  
344 *odal* (0.72 Hz; Table 1). Our simulation results indicated that when  $\tau_0$  is between 0.25  
345 and 0.5 sec, such cells do not change phototactic signs with a change in  $\tau_0$ , unlike the  
346 wild type cells that rotate at higher frequencies of ~2 Hz (Fig. 6). Taken together, these  
347 results suggest that, in the slow-swimming mutants (and most likely in the PP and NP  
348 strains also), it is more likely that the onset of ciliary dominance alteration on the dark  
349 side takes place in direct response to a light-off stimulus, rather than as a delayed  
350 response to a light-on stimulus.

351

352 **DISCUSSION**

353 In this study, we observed phototactic turning of *C. reinhardtii* cells with high-speed  
354 video recording. As previously shown (Wakabayashi et al., 2011), both PP and NP cells  
355 changed the sign of phototaxis when treated with ROS-modulating agents. Our results  
356 demonstrate that the sign of phototaxis is determined by which of the two (*cis*- and  
357 *trans*-) cilia beats stronger after photoreception, and that the sign reverses depending on  
358 whether the dominant cilium begins to beat stronger when the eyespot faces the light  
359 source or away from it (Fig. 7). An important factor that modulates when the onset of  
360 ciliary dominance occurs is the intracellular amount of ROS. Our mathematical model  
361 supports these findings.

362

363 **The cilium that becomes dominant after photoreception**

364 The first key factor that determines the phototactic sign is whether the *cis*- or the  
365 *trans*-cilium is dominant in a given strain. Several previous studies have shown that the  
366 two cilia of *C. reinhardtii* are intrinsically different (R. Kamiya & Hasegawa, 1987;  
367 Ritsu Kamiya & Witman, 1984; Ruffer & Nultsch, 1987, 1998; Ruffer & Nultsch,  
368 1991). Ruffer and Nultsch (1991, 1998) carried out high-speed cinematographic  
369 observation on cells trapped with a suction pipette. They found that, upon

370 photo-stimulation, the *trans*-cilium tended to beat more strongly (with a larger  
371 amplitude and at a higher frequency) than the other in positively phototactic strains,  
372 whereas the *cis*-cilium beat more strongly than the other in negatively phototactic  
373 strains (Ruffer & Nultsch, 1998; Ruffer & Nultsch, 1991). Our results, obtained from  
374 observation of free-swimming cells undergoing phototactic turning, are consistent with  
375 these studies.

376           How is the dominant cilium determined? The results of the present study, as  
377 well as those of Ruffer and Nultsch (1991), indicate that the cilium that becomes  
378 dominant after photostimulation is the *trans*-cilium in PP and the *cis*-cilium in NP cells.  
379 One would be inclined to assume that the Ca<sup>2+</sup> sensitivities of the *cis*- and  
380 *trans*-axonemes (the inner structure of cilia) are reversed between PP and NP. However,  
381 in detergent-extracted and motility-reactivated cell models, the Ca<sup>2+</sup>-dependent motility  
382 of the two axonemes attached to a single cell body was found not to differ between PP  
383 and NP strains (Wakabayashi et al., 2011). Therefore, factors other than axonemes may  
384 cause differences in ciliary Ca<sup>2+</sup>-response of PP and NP cells. For example, some  
385 detergent-soluble constituents of cilia, or some chemical modification of the axoneme  
386 that is not retained after detergent extraction, may be responsible.

387           Previously, we identified the defect that causes the negatively phototactic  
388 phenotype in the NP strain (*agg1*) as the loss of a protein that possibly functions in  
389 mitochondria (Ide et al., 2016). If this protein functions in the respiratory chain, the  
390 redox poise and/or the amount of ROS could differ between PP and NP cells and  
391 differentially modulate the activities of membrane proteins, such as Ca<sup>2+</sup> channels and  
392 pumps. Other *C. reinhardtii* mutants, *agg2* and *agg3*, are also known to display  
393 negative phototaxis. Although whether the *cis*- or the *trans*-cilium is dominant in these  
394 mutants has not been determined, their defects are also caused by mutations in  
395 non-axonemal proteins; the causative protein Agg2 is localized to the proximal ciliary  
396 membrane, while Agg3 is a flavodoxin that localizes to the ciliary matrix (Iomini, Li,  
397 Mo, Dutcher, & Piperno, 2006). Loss of these proteins may modulate the function of the  
398 ciliary membrane and could switch the dominant cilium.

399

#### 400 **How is the off-response of the ciliary dominance produced?**

401 The second key factor that determines the phototactic sign is the timing at which the  
402 dominant cilium starts to increase power after photoreception. We showed that *t*-BOOH,  
403 a membrane-permeable ROS that promotes positive phototaxis, induces the onset of  
404 *cis*-cilium dominance on the dark side in NP cells, whereas DMTU, a



405 membrane-permeable ROS-scavenger that promotes negative phototaxis, induces that of  
406 the *trans*-cilium dominance on the dark side in PP cells (Fig. 2A, B). The onset of  
407 ciliary dominance on the dark side could be interpreted as a so-called off response or a  
408 step-down response, which means that cells respond to a light-off stimulus. Initiation of  
409 phototactic turn as an off response has been proposed previously (Isogai et al., 2000),  
410 and the present study provides evidence for this from simultaneous observation of  
411 swimming track and eyespot position while artificially manipulating the phototaxis  
412 direction. Ruffer and Nultsch (1991) showed that the beating in the two cilia  
413 reciprocally changes upon reception of light-on as well as light-off stimuli, and  
414 suggested that cells displaying opposite cilia responses exhibit positive and negative  
415 phototaxis, which our results are in general agreement with.

416         The molecular mechanism of the off response in *C. reinhardtii* is unknown.  
417 Theoretically, a response equivalent to an off-response could be accomplished by an  
418 appropriate delay in the light-on response. However, our observations on  
419 slow-swimming mutants, as well as theoretical considerations, rule out this possibility.  
420 Previous observations by Ruffer and Nultsch (1991) that micropipette-held *C.*  
421 *reinhardtii* cells display on- and off- responses also indicate the presence of a genuine  
422 off-response. Generally, the photoreception by ChR, a light-gated cation channel, is

423 thought to induce depolarization of the cellular membrane. However, the  $\text{Ca}^{2+}$  influx at  
424 the eyespot may induce activation of  $\text{Ca}^{2+}$ -activated  $\text{K}^+$  channel (Vergara, Latorre,  
425 Marrion, & Adelman, 1998), which would induce an increase in  $\text{K}^+$  conductance and  
426 concomitant hyperpolarization of the membrane. If the light causes hyperpolarization, a  
427 light-off stimulus may induce depolarization of the membrane and elicit an off-response.  
428 In addition, recently, ROS-modulating reagents were shown to modulate the  
429 phosphorylation state of ChR1 (Bohm et al., 2019). The activity change of ChR1  
430 according to this phosphorylation state may also lead to the off-response. These  
431 possibilities can be tested by further electrophysiological analyses using  
432 ROS-modulating reagents.

433

#### 434 **Mathematical model results support the experimental data**

435 To mathematically assess the plausibility of the Dominant arm model and the  
436 Off-response model, we developed a simple model that describes the swimming  
437 behaviors of *C. reinhardtii*. The theoretical model and the experimental data both  
438 showed that the Off-response model is not accomplished by the presence of a fixed  
439 delay time in the light-on response, but by the response to a light-off stimulus (Fig. 6, 7).  
440 While several previous models have been presented to explain the photobehavior of

441 green alga, ours is one of the simplest, explaining the switching of the phototactic sign  
442 through only one equation with some changes of the system parameters (Bennett &  
443 Golestanian, 2015; Drescher et al., 2010).

444 Our model also provides clues to understanding why all the cells of the same  
445 strain under the same light conditions do not exhibit the same sign of phototaxis; for  
446 example, even when PP cells are treated with H<sub>2</sub>O<sub>2</sub>, which elicits positive phototaxis,  
447 ~5% of the cells show negative phototaxis (Wakabayashi et al., 2011). This could be  
448 explained by the variance of the delay time in the onset of ciliary dominance. Even  
449 though our model precludes the fixed delay time after treatment with the  
450 ROS-modulating reagents, the delay time may vary between cells. In Fig. 5, when  $\gamma_0 =$   
451 1 (i.e., the *trans*-cilium is dominant after photoreception) and  $I_0 = 0.1$  or  $0.5$ , cells show  
452 positive phototaxis when  $\sim 50 < \tau_0 < \sim 300$  msec. The value of  $\tau_0$  has been suggested to  
453 be longer than 30~40 msec (Rüffer & Nultsch, 1991; Witman, 1993). Thus, if a cell has  
454 longer  $\tau_0$  than 300 msec, which would be caused by several factors including kinetics of  
455 Ca<sup>2+</sup> influx and cellular ROS amounts, this cell will exhibit negative phototaxis.  
456 Furthermore, the  $\tau_0$ -vz curves in Fig. 5 will change greatly if the eyespot position  
457 somewhat varies and causes a change in the  $\tau_0$ -vz curve. If a cell has the eyespot at an  
458 irregular position, it may exhibit an opposite sign of phototaxis even with the same  $\tau_0$ .

459           In summary, our experimental observations combined with the insights from  
460   our theoretical model showed that phototactic signs of *C. reinhardtii* cells are  
461   determined by two factors: the genetically determined dominant cilium, and the timing  
462   of the onset of strong beating by the dominant cilium after photoreception (Fig. 7). The  
463   timing, either on the light side or the dark side, is modulated by the cellular amount of  
464   ROS, which is a byproduct of photosynthesis. Cells may monitor photosynthetic  
465   activities through ROS amounts, and this regulation mechanism may contribute to  
466   maintaining ideal photosynthetic activities by modifying light conditions through  
467   phototaxis.  
468

469 **MATERIALS AND METHODS**

470 *Cell culture and strains*

471 *Chlamydomonas reinhardtii* strains CC-124 (nit1<sup>-</sup> (nitrate reductase), nit2<sup>-</sup>, aggl<sup>-</sup>,  
472 mt<sup>-</sup> (mating type))(Ide et al., 2016), CC-125 (nit1<sup>-</sup>, nit2<sup>-</sup>, mt<sup>+</sup>), CC-2670 (ida4<sup>-</sup>, mt<sup>+</sup>),  
473 and CC-2228 (oda1<sup>-</sup>, mt<sup>+</sup>) were used. CC-124 and CC-125 were termed PP and NP,  
474 respectively. The CC-125 strain maintained in our laboratory appears to have a slight  
475 difference in motility characteristics from the same strain available from the  
476 Chlamydomonas Resource Center (<http://www.chlamycollection.org/>) (Sato, Sato, &  
477 Toyoshima, 2018; Wakabayashi et al., 2011). CC-2670 (*ida4*; lacking inner-arm  
478 dyneins a, c, and d) and CC-2228 (*oda1*; lacking outer-arm dynein and the outer-dynein  
479 arm docking complex) were used as slow-swimming mutants. Cells were grown in  
480 tris-acetate phosphate medium (TAP) medium with aeration at 25 °C, on a 12 h/12 h  
481 light/dark cycle (Gorman & Levine, 1965).

482

483 *High-speed observation of phototaxis and measurement of the bodily rotation cycle*

484 Cells were washed with an experimental solution (5 mM Hepes (pH 7.4), 0.2 mM  
485 EGTA, 1 mM KCl, 0.3 mM CaCl<sub>2</sub>) (Okita, Isogai, Hirono, Kamiya, & Yoshimura,  
486 2005) and kept under red light for more than 50 minutes before the assays. To induce

487 positive or negative phototaxis, the cell suspensions were treated with  
488 tertiary-butylhydroperoxide (*t*-BOOH; final concentration is 0.2 mM) (Wako Pure  
489 Chemical Industries) as a ROS reagent, or dimethylthiourea (DMTU; final  
490 concentration is 75 mM) (Sigma-Aldrich) as a ROS-scavenging reagent (Wakabayashi  
491 et al., 2011). Cell suspensions were put between a coverslip and a glass slide and placed  
492 on the stage of a dark-field microscope with an oil-immersion condenser (BX53;  
493 Olympus). The directional light to induce phototaxis was produced with two green  
494 LEDs ( $\lambda=525$  nm). The setup is shown in Fig. 2A. First, a weak green light ( $\sim 5$   $\mu\text{mol}$   
495  $\text{photons m}^{-2} \text{s}^{-1}$ ) was illuminated (Light 1 in Fig. 2A). Most cells showed either positive  
496 or negative phototaxis. Then a stronger green light (Light 2 in Fig. 2A;  $\sim 30$   $\mu\text{mol}$   
497  $\text{photons m}^{-2} \text{s}^{-1}$ ) was illuminated, perpendicular to Light 1. Most of the cells then  
498 changed their swimming directions and oriented parallel to the Light 2 beam. The  
499 behavior of cells was observed with dim red light ( $\lambda > 600$  nm) and videos were  
500 recorded with a high-speed camera (HAS-L2M, DITECT) at 150 fps. The LED for  
501 Light 2 was linked with the trigger switch of the high-speed camera so that recording  
502 was initiated when it was lit. The timing of photoreception was determined as the time  
503 when the eyespot faced the Light 2 side (Fig. 2A, 2B). The position of the eyespot in the  
504 helical swimming paths was also determined from the same video footage.

505           The measurement of the bodily rotation cycle was carried out with the same  
506 experimental setup as above (without sideways illuminations). The time required for  
507 one bodily rotation was determined from the position of the eyespot on the swimming  
508 trajectories, and the rotation period was calculated.

509

### 510 *Phototaxis assay*

511 The phototaxis assay shown in Fig. 5 was carried out by the method described in (Ueki  
512 et al., 2016). In brief, cells were washed with the experimental solution and kept under  
513 dim red light for 30 min before the phototaxis assays. For dish assays, cell suspensions  
514 ( $\sim 10^7$  cells/mL) were put in Petri dishes (30 mm in diameter, 10 mm thick), illuminated  
515 with a green LED ( $\lambda = 525$  nm,  $\sim 50$   $\mu\text{mol photons m}^{-2} \text{ s}^{-1}$ ) from one side for 5 min, and  
516 photographed (DSC-RX100M2; Sony). For single-cell analysis, cells were observed  
517 under a dark-field microscope (BX-53, Olympus) under dim red light ( $\lambda > 600$  nm) and  
518 recorded to video using a CCD camera (1129HMN1/3; Wraymer). The angle ( $\theta$ )  
519 between the light direction and the swimming direction was measured for 1.5 s,  
520 following illumination with a green LED for 15 s. Images of swimming cells were  
521 auto-tracked using Image Hyper software (Science Eye), and angles were measured  
522 from the cell trajectories. t-BOOH (final concentration of 0.2 mM; Wako Pure

523 Chemical Industries) was used as a ROS reagent, and dimethylthiourea (final  
524 concentration of 75 mM; Sigma-Aldrich) was used as a ROS-scavenging reagent

525

### 526 *Electrophysiology*

527 PRCs were assessed in a population of *C. reinhardtii* cells by the method  
528 of Sineshchekov et al. (1992) (O. A. Sineshchekov et al., 1992, 1994). In brief, 1 ml of  
529 cell suspension in a measuring solution (0.5 mM Hepes, pH 7.3, 0.1 mM CaCl<sub>2</sub>) was put  
530 in a cuvette (10×10×15 mm), with two electrodes on each side of its rectangular bottom.  
531 A 500 nm beam of light was generated with an LED source (NSPE510S, Nichia  
532 Chemical) and applied from one side of the electrode. The current was measured with a  
533 patch-clamp amplifier (Axoclamp 200B, Axon).

534

### 535 *Measurement of ciliary beating frequency*

536 Ciliary beating frequency (CBF) was measured based on the method described in (R  
537 Kamiya, 2000) with modifications (Wakabayashi & King, 2006). The median frequency  
538 was obtained from the power spectra of fast Fourier-transformed cell body vibration  
539 signals in microscopy images averaged for ~20 s.

540



541 *Measurement of bodily rotation cycle*

542 Cells were observed under a dark-field microscope with an oil-immersion condenser

543 (BX-53, Olympus) and recorded to video with a high-speed camera (HAS-L2M,

544 DITECT) at 150 fps. The bodily rotation cycle was defined as the time it takes for the

545 eyespot (observed as a bright spot) to return to the same position relative to the cell's

546 swimming trajectory, and was measured by counting the frames for one cycle.

547

548

549

550 **Acknowledgments**

551 This work was supported by Japan Society for the Promotion of Science KAKENHI  
552 Grants 19H03242 to KW, 16H06556 to TH, 17H02939 to KS, 17K07370 to KY,  
553 19K23758 to NU, by Ohsumi Frontier Science Foundation to KW, by Global Station  
554 for Soft Matter at Hokkaido University to KS and TN, by Dynamic Alliance for Open  
555 Innovation Bridging Human, Environment and Materials to TH, KS, TN, and KW and  
556 by the Japan Agency for Medical Research and Development (AMED/PRIME) grant  
557 JP18gm5810013 to KY.

558

559 **Competing interests**

560 The authors declare that no competing interests exist.

561

562 **References**

- 563 Bennett, R. R., & Golestanian, R. (2015). A steering mechanism for phototaxis in  
564 *Chlamydomonas*. *J R Soc Interface*, *12*(104), 20141164.
- 565 Bohm, M., Boness, D., Fantisch, E., Erhard, H., Frauenholz, J., Kowalzyk, Z., . . .  
566 Kreimer, G. (2019). Channelrhodopsin-1 Phosphorylation Changes with  
567 Phototactic Behavior and Responds to Physiological Stimuli in *Chlamydomonas*.  
568 *Plant Cell*, *31*(4), 886-910.
- 569 Drescher, K., Goldstein, R. E., & Tuval, I. (2010). Fidelity of adaptive phototaxis. *Proc*  
570 *Natl Acad Sci U S A*, *107*(25), 11171-11176.
- 571 Feinleib, M. E. H., & Curry, G. M. (1971). The relationship between stimulus intensity  
572 and oriented phototactic response (topotaxis) in *Chlamydomonas*. In  
573 *Physiologia Plantarum* (Vol. 25, pp. 346-352).
- 574 Foster, K. W., & Smyth, R. D. (1980). Light Antennas in phototactic algae. *Microbiol*  
575 *Rev*, *44*(4), 572-630.
- 576 Gorman, D. S., & Levine, R. P. (1965). Cytochrome f and plastocyanin: their sequence  
577 in the photosynthetic electron transport chain of *Chlamydomonas reinhardi*.  
578 *Proc Natl Acad Sci U S A*, *54*(6), 1665-1669.
- 579 Ide, T., Mochiji, S., Ueki, N., Yamaguchi, K., Shigenobu, S., Hirono, M., &  
580 Wakabayashi, K.-i. (2016). Identification of the *agg1* mutation responsible for  
581 negative phototaxis in a “wild-type” strain of *Chlamydomonas reinhardtii*.  
582 *Biochemistry and Biophysics Reports*, *7*, 379-385.
- 583 Iomini, C., Li, L., Mo, W., Dutcher, S. K., & Piperno, G. (2006). Two flagellar genes,  
584 *AGG2* and *AGG3*, mediate orientation to light in *Chlamydomonas*. *Curr Biol*,  
585 *16*(11), 1147-1153.
- 586 Isogai, N., Kamiya, R., & Yoshimura, K. (2000). Dominance between the two flagella  
587 during phototactic turning in *Chlamydomonas*. *Zool Sci*, *17*, 1261-1266.
- 588 Kamiya, R. (1988). Mutations at twelve independent loci result in absence of outer  
589 dynein arms in *Chlamydomonas reinhardtii*. *J Cell Biol*, *107*(6 Pt 1), 2253-2258.
- 590 Kamiya, R. (2000). Analysis of cell vibration for assessing axonemal motility in  
591 *Chlamydomonas*. *Methods*, *22*, 383-387.
- 592 Kamiya, R., & Hasegawa, E. (1987). Intrinsic difference in beat frequency between the  
593 two flagella of *Chlamydomonas reinhardtii*. *Exptl. Cell Res.*, *173*, 299-304.
- 594 Kamiya, R., Kurimoto, E., & Muto, E. (1991). Two types of *Chlamydomonas* flagellar  
595 mutants missing different components of inner-arm dynein. *J Cell Biol*, *112*(3),  
596 441-447.

- 597 Kamiya, R., & Witman, G. B. (1984). Submicromolar levels of calcium control the  
598 balance of beating between the two flagella in demembrated models of  
599 Chlamydomonas. *J Cell Biol*, 98(1), 97-107.
- 600 Kondo, T., Johnson, C. H., & Hastings, J. W. (1991). Action spectrum for resetting the  
601 circadian phototaxis rhythm in the CW15 strain of Chlamydomonas 1. Cells in  
602 darkness. *Plant Physiol*, 95, 197-205.
- 603 Landau, L. D., Lifshitz, E. M. (1976). *Mechanics, 3rd ed.* (Vol. 1 (Course of Theoretical  
604 Physics)): Oxford: Butterworth-Heinemann.
- 605 Morel-Laurens, N. (1987). Calcium control of phototactic orientation in  
606 Chlamydomonas reinhardtii: sign and strength of response. *Photochem*  
607 *Photobiol*, 45(1), 119-128.
- 608 Nagel, G., Ollig, D., Fuhrmann, M., Kateriya, S., Musti, A. M., Bamberg, E., &  
609 Hegemann, P. (2002). Channelrhodopsin-1: a light-gated proton channel in green  
610 algae. *Science*, 296(5577), 2395-2398.
- 611 Nagel, G., Szellas, T., Huhn, W., Kateriya, S., Adeishvili, N., Berthold, P., . . . Bamberg,  
612 E. (2003). Channelrhodopsin-2, a directly light-gated cation-selective membrane  
613 channel. *Proc Natl Acad Sci U S A*, 100(24), 13940-13945.
- 614 Okita, N., Isogai, N., Hirono, M., Kamiya, R., & Yoshimura, K. (2005). Phototactic  
615 activity in Chlamydomonas 'non-phototactic' mutants deficient in  
616 Ca<sup>2+</sup>-dependent control of flagellar dominance or in inner-arm dynein. *J Cell*  
617 *Sci*, 118(Pt 3), 529-537.
- 618 Ruffer, U., & Nultsch, W. (1987). Comparison of the beating of cis- and trans-flagella of  
619 Chlamydomonas cells held on micropipettes. *Cell Motil Cytoskeleton*, 7, 87-93.
- 620 Ruffer, U., & Nultsch, W. (1998). Flagellar coordination in Chlamydomonas cells held  
621 on micropipettes. *Cell Motil Cytoskeleton*, 41(4), 297-307.
- 622 Ruffer, U., & Nultsch, W. (1991). Flagellar photoresponses of Chlamydomonas cells  
623 held on micropipettes: II. Change in flagellar beat pattern. *Cell Motility*  
624 *Cytoskeleton*, 18(4), 269-278.
- 625 Sato, N., Sato, K., & Toyoshima, M. (2018). Analysis and modeling of the inverted  
626 bioconvection in Chlamydomonas reinhardtii: emergence of plumes from the  
627 layer of accumulated cells. *Heliyon*, 4(3), e00586.
- 628 Sineshchekov, O. A., Govorunova, E. G., Der, A., Keszthelyi, L., & Nultsch, W. (1992).  
629 Photoelectric Responses in Phototactic Flagellated Algae Measured in  
630 Cell-Suspension. *J Photochem Photobiol B-Biology*, 13(2), 119-134.
- 631 Sineshchekov, O. A., Govorunova, E. G., Der, A., Keszthelyi, L., & Nultsch, W. (1994).  
632 Photoinduced electric currents in carotenoid-deficient Chlamydomonas mutants

- 633 reconstituted with retinal and its analogs. *Biophys J*, 66(6), 2073-2084.
- 634 Sineshchekov, O. A., Jung, K.-H., & Spudich, J. L. (2002). Two rhodopsins mediate  
635 phototaxis to low- and high-intensity light in *Chlamydomonas reinhardtii*. *PNAS*,  
636 99(13), 8689-8694.
- 637 Suzuki, T., Yamasaki, K., Fujita, S., Oda, K., Iseki, M., Yoshida, K., . . . Takahashi, T.  
638 (2003). Archaeal-type rhodopsins in *Chlamydomonas*: model structure and  
639 intracellular localization. *Biochem Biophys Res Commun*, 301(3), 711-717.
- 640 Takada, S., Wilkerson, C. G., Wakabayashi, K., Kamiya, R., & Witman, G. B. (2002).  
641 The outer Dynein arm-docking complex: composition and characterization of a  
642 subunit (oda1) necessary for outer arm assembly. *Mol Biol Cell*, 13(3),  
643 1015-1029.
- 644 Takahashi, T., & Watanabe, M. (1993). Photosynthesis modulates the sign of phototaxis  
645 of wild-type *Chlamydomonas reinhardtii*. Effects of red background illumination  
646 and 3-(3',4'-dichlorophenyl)-1,1-dimethylurea. *FEBS Lett*, 336(3), 516-520.
- 647 Ueki, N., Ide, T., Mochiji, S., Kobayashi, Y., Tokutsu, R., Ohnishi, N., . . . Wakabayashi,  
648 K. (2016). Eyespot-dependent determination of the phototactic sign in  
649 *Chlamydomonas reinhardtii*. *Proc Natl Acad Sci U S A*, 113(19), 5299-5304.
- 650 Vergara, C., Latorre, R., Marrion, N. V., & Adelman, J. P. (1998). Calcium-activated  
651 potassium channels. *Curr Opin Neurobiol*, 8(3), 321-329.
- 652 Wakabayashi, K., & King, S. M. (2006). Modulation of *Chlamydomonas reinhardtii*  
653 flagellar motility by redox poise. *J Cell Biol*, 173(5), 743-754.
- 654 Wakabayashi, K., Misawa, Y., Mochiji, S., & Kamiya, R. (2011). Reduction-oxidation  
655 poise regulates the sign of phototaxis in *Chlamydomonas reinhardtii*. *Proc Natl*  
656 *Acad Sci U S A*, 108(27), 11280-11284.
- 657 Witman, G. B. (1993). *Chlamydomonas* phototaxis. *Trends Cell Biol*, 3, 403-408.
- 658

659 **Table 1. Ciliary beating frequencies and bodily rotation cycles of strains used**

|                                                                      | PP              | NP              | <i>ida4</i>     | <i>oda1</i>     |
|----------------------------------------------------------------------|-----------------|-----------------|-----------------|-----------------|
| Ciliary Beating Frequency (Hz)<br>(Mean $\pm$ SEM, n=3 measurements) | 55.0 $\pm$ 0.6  | 55.5 $\pm$ 1.0  | 51.6 $\pm$ 2.6  | 24.3 $\pm$ 0.6  |
| Bodily rotation cycle (Hz)<br>(Mean $\pm$ SD, n=10 cells)            | 2.11 $\pm$ 0.27 | 1.89 $\pm$ 0.27 | 1.25 $\pm$ 0.22 | 0.72 $\pm$ 0.09 |

660

661

662 **Figure legends**

663 **Fig. 1**

664 **Schematic images of a *Chlamydomonas reinhardtii* cell and its phototaxis.**

665 (A) Schematic image of *C. reinhardtii* cell and the eyespot. The cilium closest to the  
666 eyespot is called *cis*-cilium, whereas the one farthest from the eyespot is called  
667 *trans*-cilium. The eyespot is composed of the carotenoid-rich granule layers that  
668 function as a light reflector, and channelrhodopsin molecules aligned in the plasma  
669 membrane. Channelrhodopsin functions as a light-gated cation channel. The light signal  
670 coming from the outside of the cell is reflected by the carotenoid granule layers and  
671 amplified, whereas that coming through the cell is blocked. (B) The current model to  
672 explain positive phototaxis. After photoreception at the eyespot (yellow arrow),  $[Ca^{2+}]_i$   
673 in the cilia increases and the *trans*-cilium (t) becomes dominant. After a half rotation of  
674 the cell around its central axis, the light signal to the eyespot is blocked,  $[Ca^{2+}]_i$  in the  
675 cilia decreases, and the *cis*-cilium (c) becomes dominant. (C) Hypothetical models for  
676 negative phototaxis. In the “Dominant arm model”,  $Ca^{2+}$ -sensitivities of two cilia are  
677 assumed to be reversed from the positively phototactic cell shown in (B); the *cis*-cilium  
678 becomes dominant after photoreception. In the “Off-response model”, after

679 photoreception, the *trans*-cilium becomes dominant when the eyespot faces opposite to  
680 the light source.

681

682 **Fig. 2**

683 **Eyespot position relative to the cell trajectory during phototaxis.**

684 (A) Phototactic turnings of PP and NP cells after treatment with t-BOOH or DMTU.

685 Images of a swimming cell, taken at 150 fps, are superimposed every 0.13 sec. First,

686 Light 1 (weak green light from the left) was illuminated to induce positive (top;

687 swimming to the left) or negative (bottom; swimming to the right) phototaxis. After

688 Light 2 (strong green light from the top) was turned on, the cell changed its swimming

689 direction. The timing of the onset of Light 2 was at the white arrows/arrowhead. The

690 eyespot facing Light 2 is shown with green arrowheads, whereas that facing opposite to

691 Light 2 is shown with magenta arrowheads. The former case is classified as “the light

692 side”) and the latter “the dark side” in (B). Yellow arrows show the swimming

693 directions. (The cells whose trajectories intersect with the superimposed cells were

694 removed from the image in the process creating the superimpose. See SI Movies S1-4

695 for the raw data.) (B) The proportion of the dominant cilium and the side where the

696 onset of the ciliary dominance occurred. PP cells showing positive phototaxis (control



697 and  $+t$ -BOOH) or negative phototaxis (+DMTU) and NP cells showing negative  
698 phototaxis (control and +DMTU) or positive phototaxis ( $+t$ -BOOH) were observed  
699 (n=8~28 per condition).

700

701 **Fig. 3**

702 **Mathematical model for *C. reinhardtii* phototaxis.**

703 (A) Definitions of the body axes of a *C. reinhardtii* cell. The vectors **a**, **b** and **c** are unit  
704 vectors that are fixed to the body of the cell. **a**, **b** and **c** are mutually orthogonal to each  
705 other, and **b** and **c** are within the ciliary beat plane. **b** is close to the side of *cis*-cilium.  
706 With them, the direction of eyespot is expressed as  $\mathbf{e}_{\text{eyespot}} = (\mathbf{b} + \mathbf{c}) / \sqrt{2}$ . The directions  
707 of **a**, **b** and **c** evolve with time according to Eq. 1. (B) Definitions of the Euler angles  
708 that specify the directions of **a**, **b**, **c** for the x, y, z coordinate system that is fixed in  
709 space.  $\theta_1$  is the angle between the y-axis and the vector  $\mathbf{N}$ , where  $\mathbf{N} = \mathbf{z} \times \mathbf{c} / |\mathbf{z} \times \mathbf{c}|$ .  
710  $\theta_2$  and  $\theta_3$  are angles between the z-axis and **c** and between  $\mathbf{N}$  and **b**,  
711 respectively. When  $\theta_1 = \theta_2 = \theta_3 = 0$ , **a**, **b**, **c** axes coincide with  $x$ ,  $y$ ,  $z$  axes,  
712 respectively. (C), (D) Examples of initial trajectories of the cell obeying Eq. 1  
713 ( $0 \leq t \leq 10$ ), which indicate positive phototaxis ( $\tau_0 = 0.08$  sec, (C)) and negative  
714 phototaxis ( $\tau_0 = 0.32$  sec. (D)). The parameters are  $\gamma_0 = 1$  (the *trans*-cilium becomes

715 dominant after photoreception at the eyespot) and  $I_0 = 0.5$ , and the initial conditions  
716 are  $\mathbf{r}(0) = (0, 0, 0)$ ,  $\theta_1(0) = 0$ ,  $\theta_2(0) = -\pi/2$  and  $\theta_3(0) = 0$ . Thick orange arrows  
717 show the direction of the light illumination, and thin black arrows show the swimming  
718 direction of the cell.

719

720 **Fig. 4**

721 **Sign-switching of phototaxis in the mathematical model.**

722 The mean velocity  $\bar{v}_z$  of the steady-state of the cell after a long-time simulation as a  
723 function of the delay time  $\tau_0$  for various values of  $\gamma_0$  and  $I_0$ . For each set of system  
724 parameters, only one steady state of Eq. 1 realizes, which does not depend on the initial  
725 conditions of  $\theta_1$ ,  $\theta_2$ ,  $\theta_3$ ,  $\mathbf{r}$ .  $\bar{v}_z$  changes with  $\tau_0$ ; especially, the sign of  $\bar{v}_z$  (=the  
726 sign of phototaxis) changes with  $\gamma_0$  and  $\tau_0$ . Blue dots are the states where solution S5  
727 realizes, while red dots are the states where solution S6 realizes. Black dots with bars  
728 are the states where solutions other than Eqs. S5 or S6 are achieved, in which  $v_z(t)$   
729 oscillates in time. The bars indicate the standard deviation of  $v_z$  of the steady-state.

730 The parameter values used are  $v_0 = 120$  [ $\mu\text{m/s}$ ],  $[1/\text{s}]$  and  $\omega_a^{(0)} = 2\pi$  [ $1/\text{s}$ ]. The initial  
731 conditions are:  $\mathbf{r}(0) = (0, 0, 0)$ ,  $\theta_i(0) = \delta_i$  with random numbers  $\delta_i \in [0, 2\pi]$  for  
732  $i = 1, 2, 3$ , and  $dI(t)/dt = 0$  for  $0 \leq t \leq \tau_0$ . For the discretization of Eq. S1, the Euler

733 method was used ( $\Delta t = 1 / 10000$ ). The model suggests that, when  $\gamma_0 = 1$  (i.e. the  
734 *trans*-cilium is dominant), the cell shows positive phototaxis (i.e.  $\gamma_0$  is positive) when  
735 the dominant cilium beats stronger than the *cis*-cilium with the delay ( $\tau_0$ ) 50~260 ms.  
736 Similarly, when  $\gamma_0 = -1$  (i.e. the *cis*-cilium is dominant), the cell shows negative  
737 phototaxis under the same conditions.

738

739 **Fig. 5**

740 **Phototaxis assay of the slow-swimming mutants.**

741 (A) PP, NP, *oda1*, and *ida4* cell suspensions put in Petri dishes with or without  
742 ROS-modulating reagents (0.2 mM *t*-BOOH or 75 mM DMTU) were illuminated by  
743 green LED ( $\lambda = 525$  nm,  $30 \mu\text{mol photons m}^{-2} \text{s}^{-1}$ ) from the right (green arrows) for 5 min  
744 from the right. Cells showing positive phototaxis are accumulated in the right halves of  
745 the dishes (orange boxes with “P”) and those showing negative phototaxis are  
746 accumulated in the left halves of the dishes (blue boxes with “N”). (B) Polar histograms  
747 depicting the percentage of cells moving in a particular direction relative to light  
748 illuminated from the right (green arrows), with or without treatment with  
749 ROS-modulating reagents (12 bins of  $30^\circ$ ;  $n = 30$  cells per condition).

750

751 **Fig. 6**

752 **Sign-switching of phototaxis in a slow-swimming mutant in the mathematical**  
753 **model.**

754 The plot of the mean velocity  $\bar{v}_z$  of the steady-state of the mathematical model (Eqs.  
755 S3 and S4) concerning the delay time  $\tau_0$  for cells rotate at 0.67 Hz, three times slower  
756 than typical wild-type cells ( $\sim 2.0$  Hz). The parameter values used here are the same as  
757 those used in Fig. 4 except for  $\omega_a^{(0)}$  representing the bodily rotation cycle. The  
758 meanings of blue, red, and black dots and bars in this figure are the same as those in Fig.  
759 4.

760

761 **Fig. 7**

762 **Schematic model of sign-reversal in phototaxis suggested by this study.**

763 To make a phototactic turning, *cis*-dominant strain beats the *cis*-cilium (C) stronger than  
764 the *trans*-cilium (T), whereas *trans*-dominant strain beats the *trans*-cilium stronger than  
765 the *cis*-cilium. The *trans*-dominant strain, such as PP in this study, shows positive  
766 phototaxis when the strong beating occurs upon light-on response (i.e. when the eyespot  
767 faces the light side) and negative phototaxis when it occurs upon light-off response (i.e.  
768 when the eyespot faces the dark side). The *cis*-dominant strain, such as NP in this study,

769 shows negative phototaxis when the strong beating occurs upon light-on response and

770 positive phototaxis when it occurs light-off response.

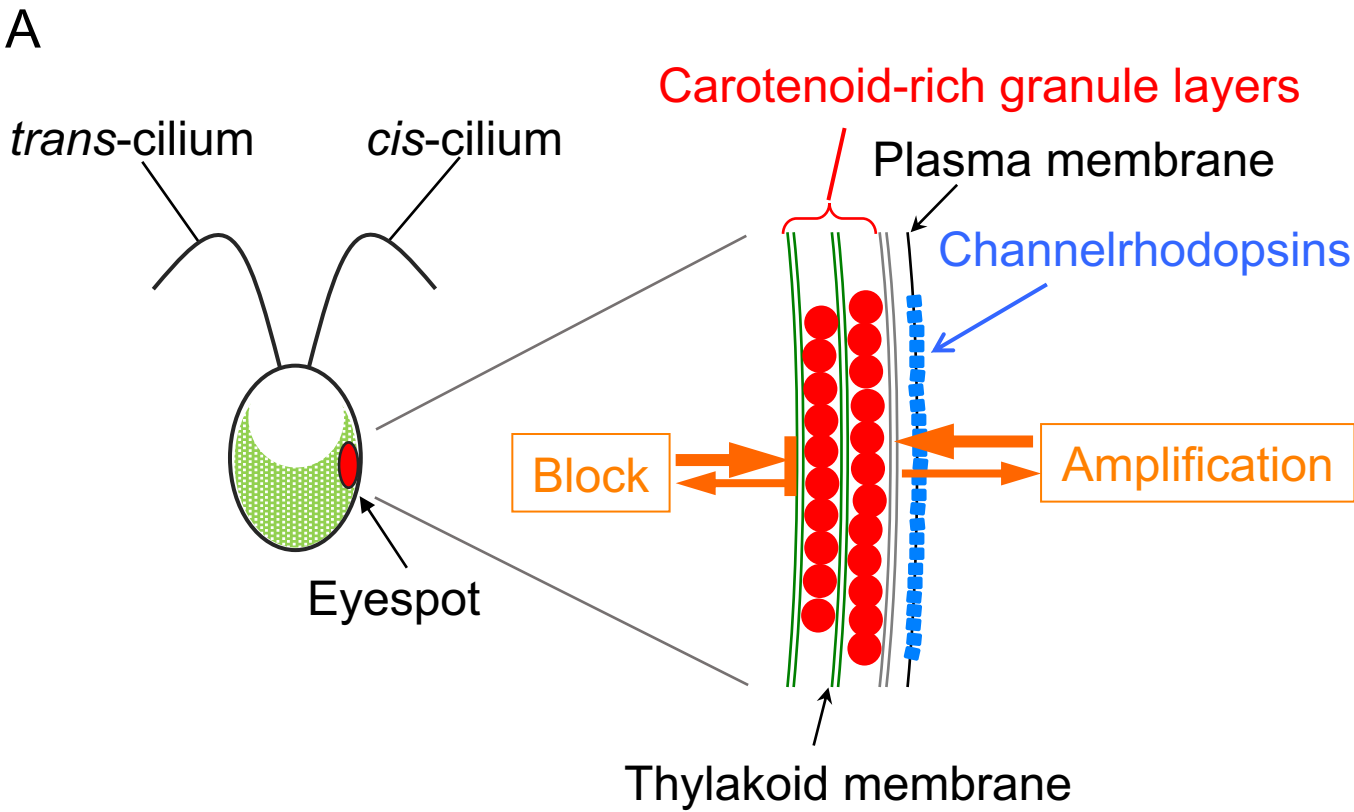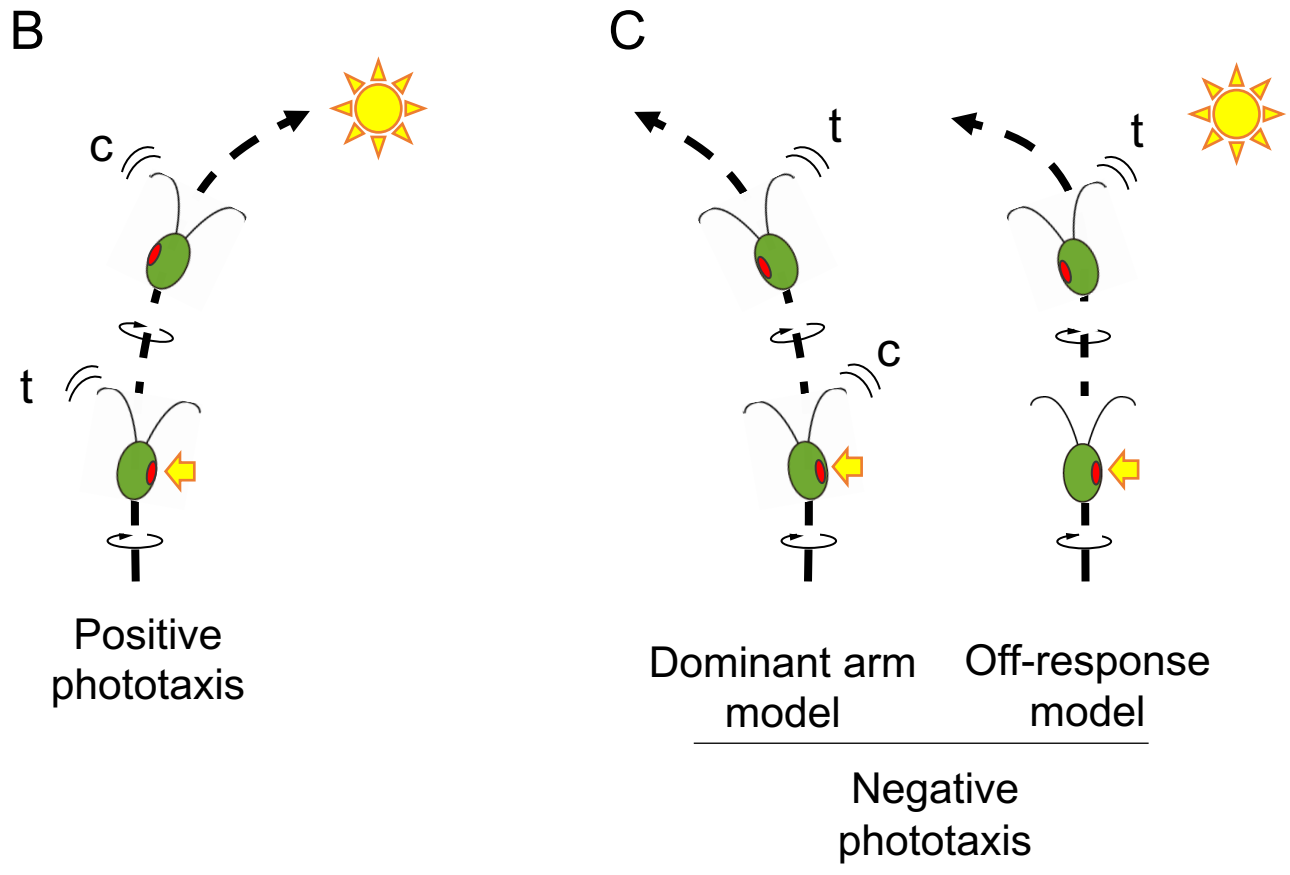

Fig. 1 Schematic images of a *Chlamydomonas reinhardtii* cell and its phototaxis.

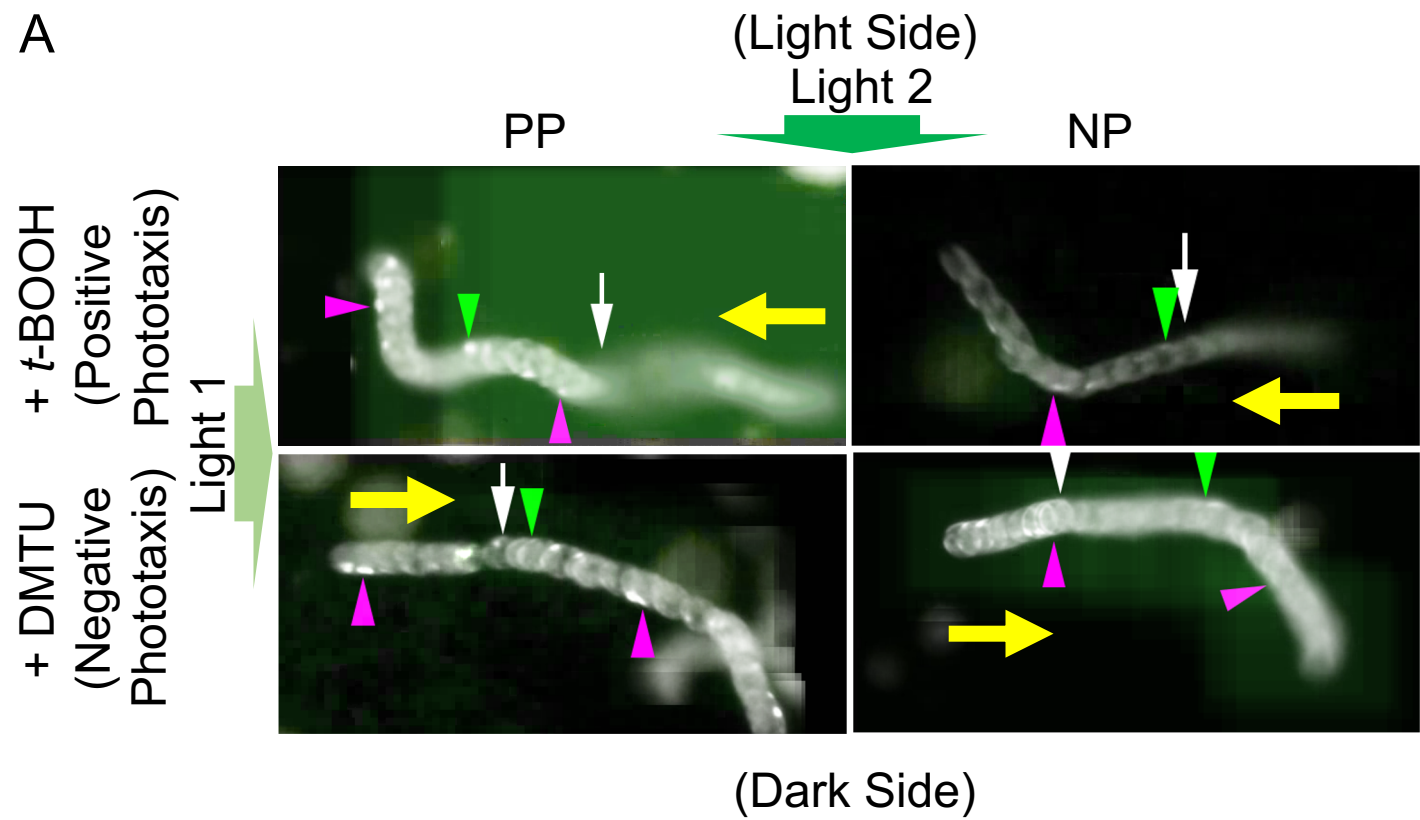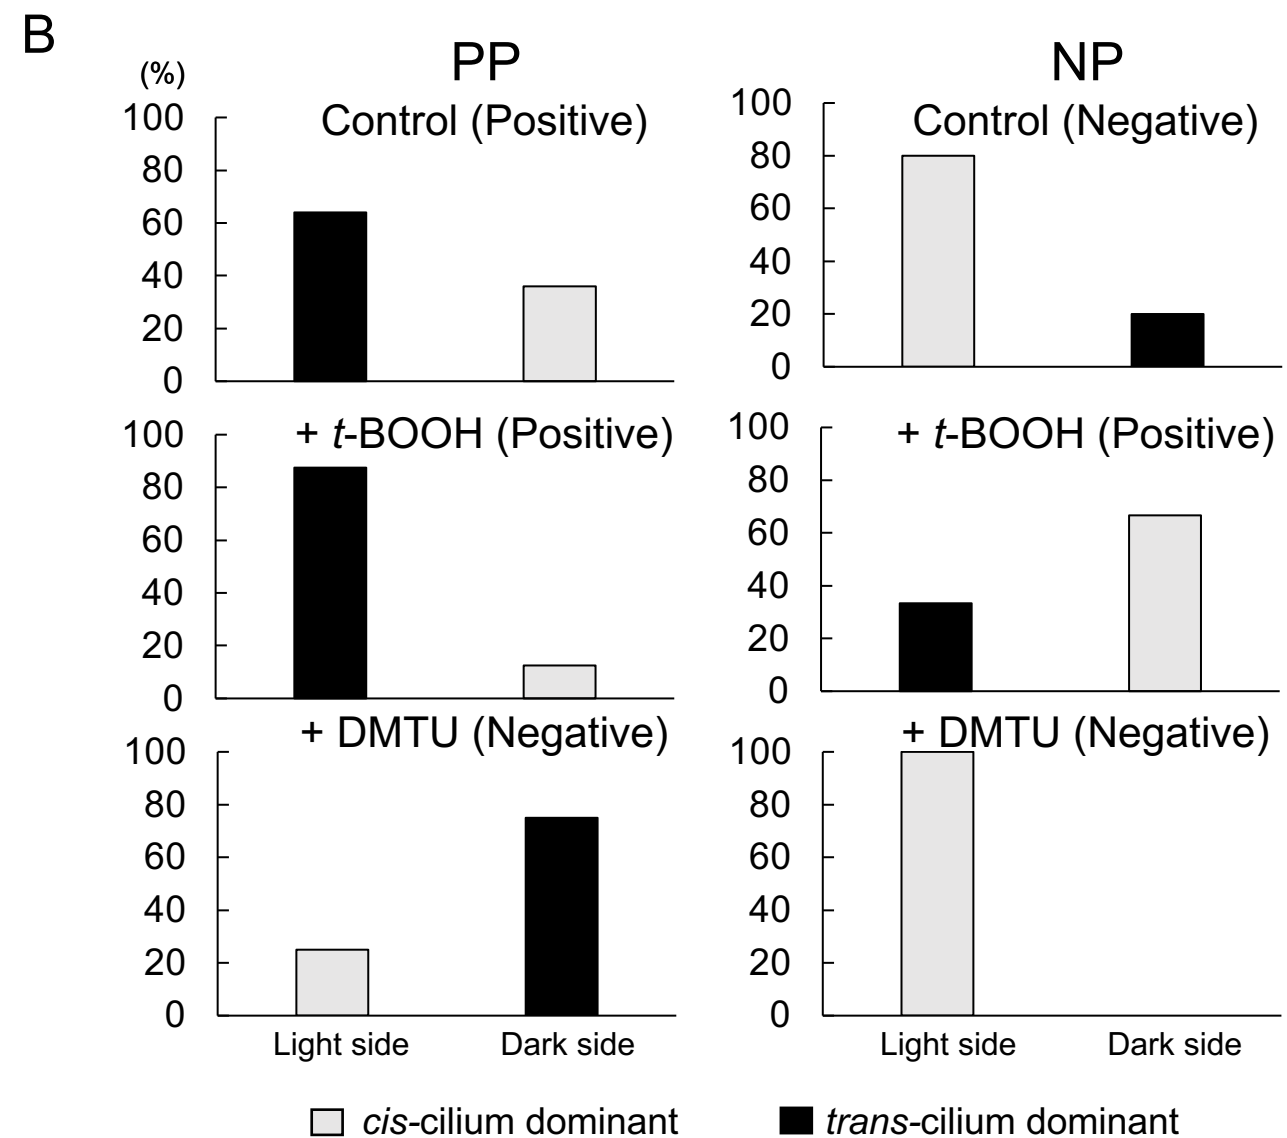

Fig. 2 Eyespot position relative to the cell trajectory during phototaxis.

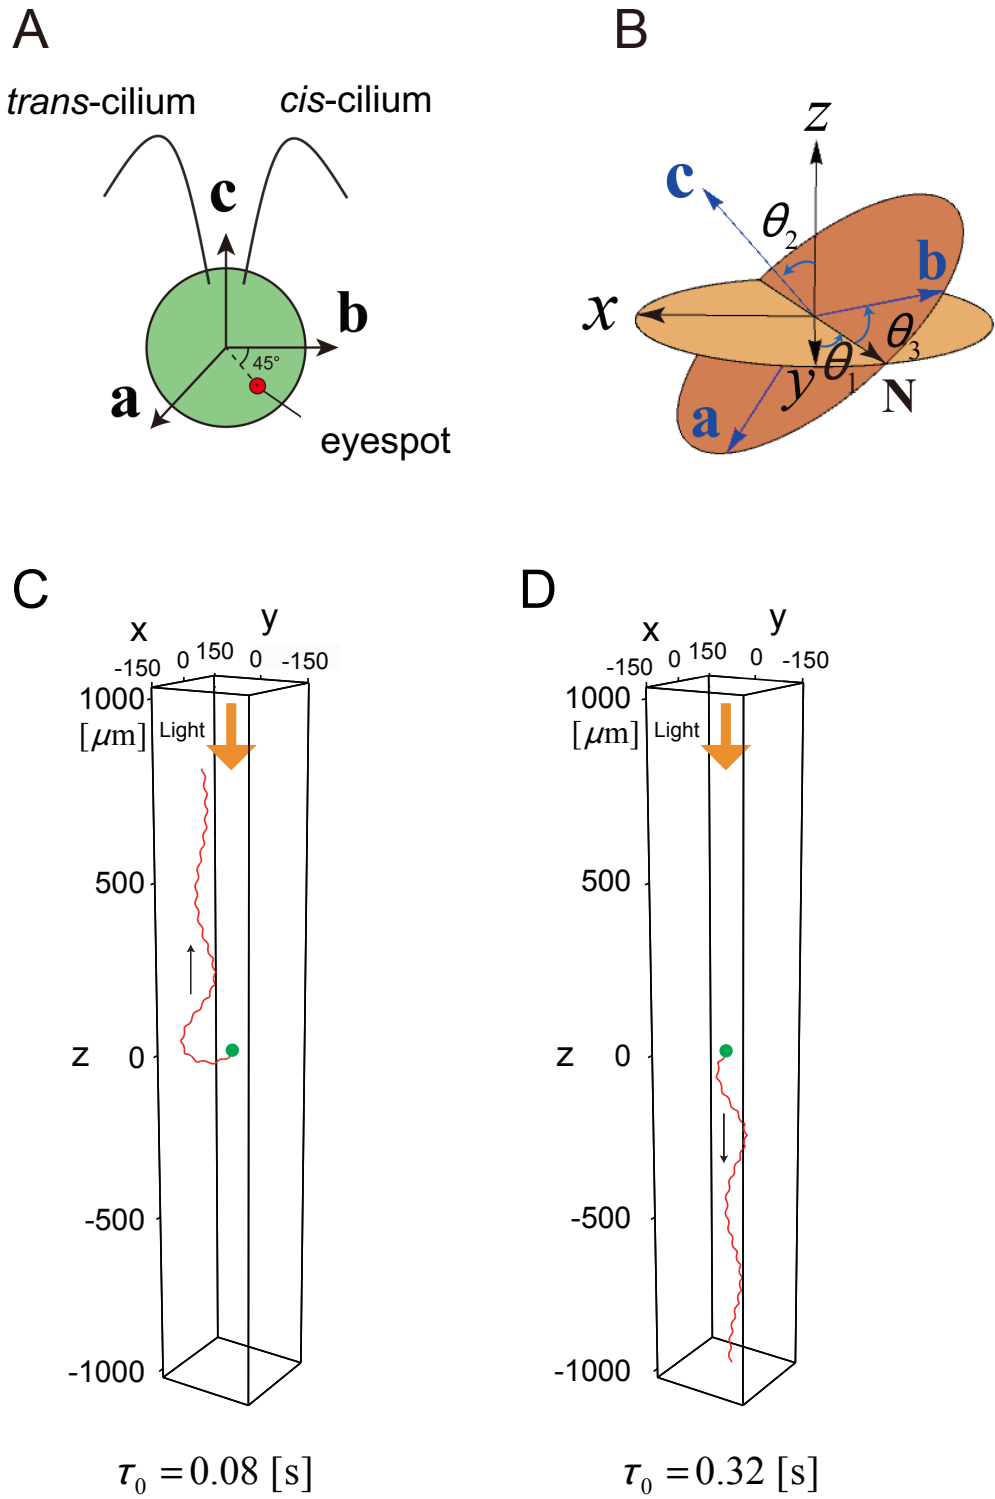

Fig. 3 Mathematical model for *C. reinhardtii* phototaxis.



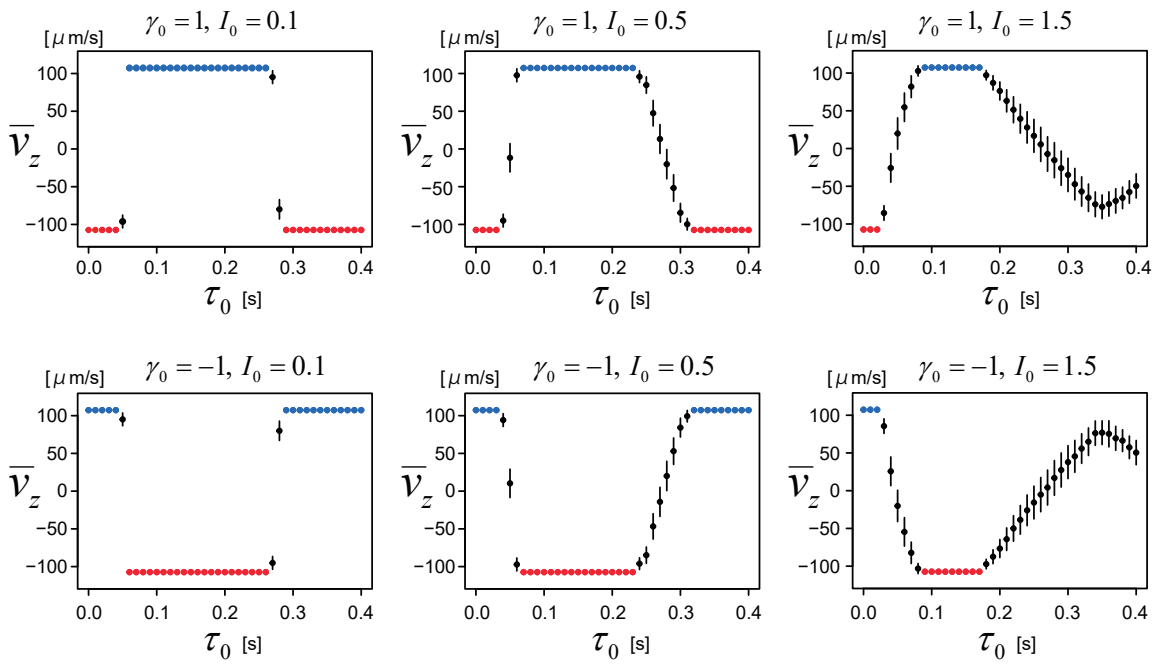

Fig. 4 Sign-switching of phototaxis in the mathematical model.

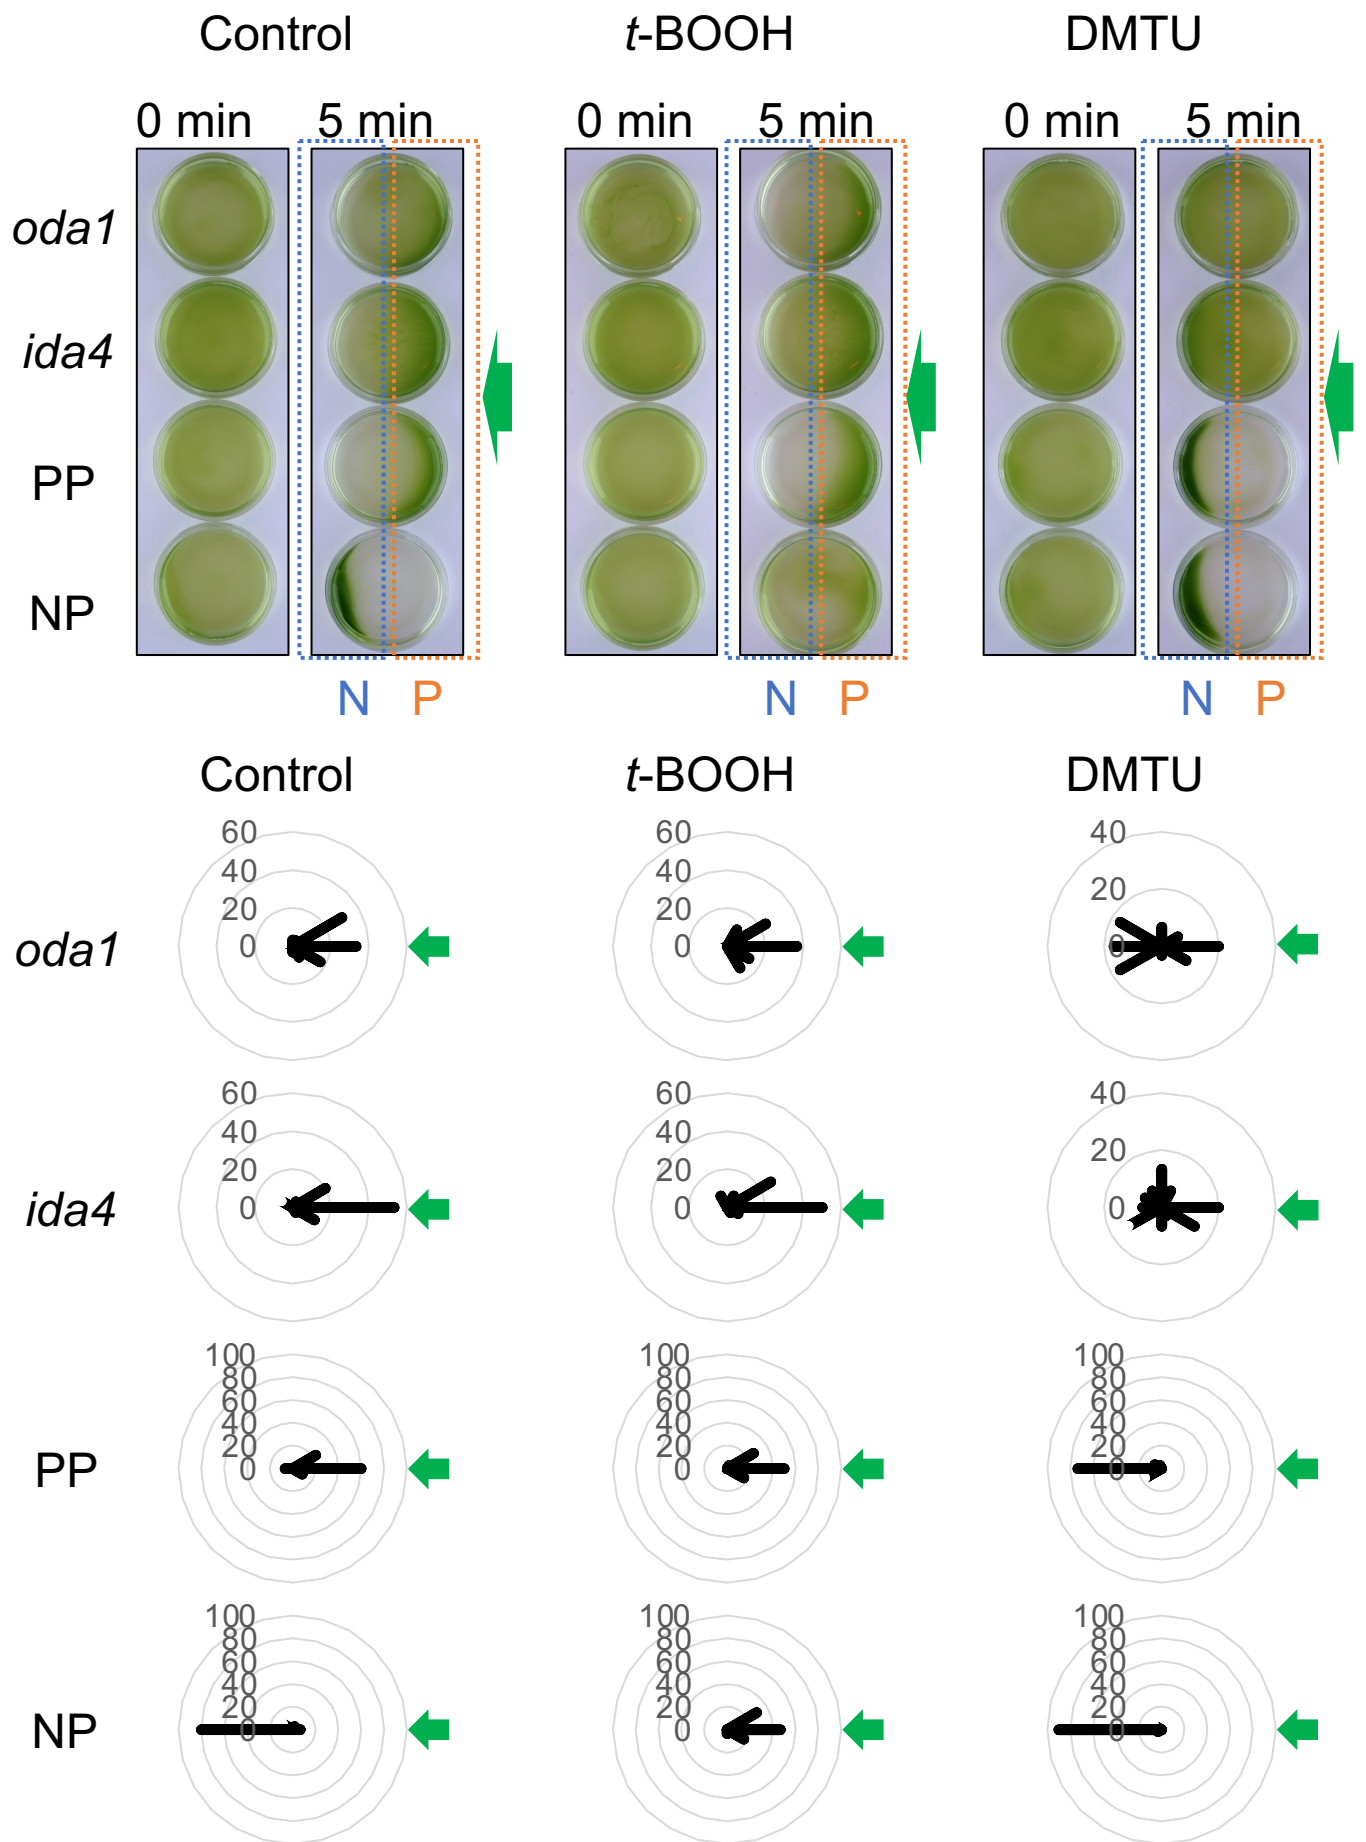

Fig. 5 Phototaxis assay of the slow-swimming mutants.

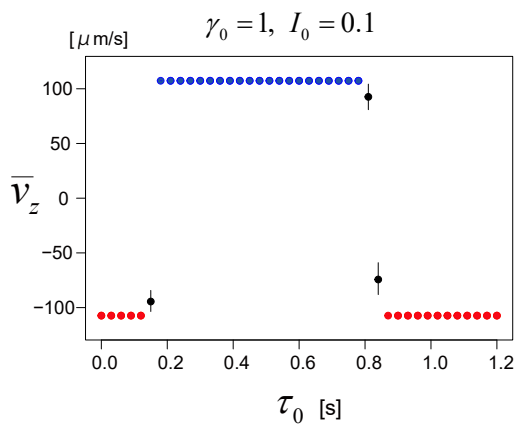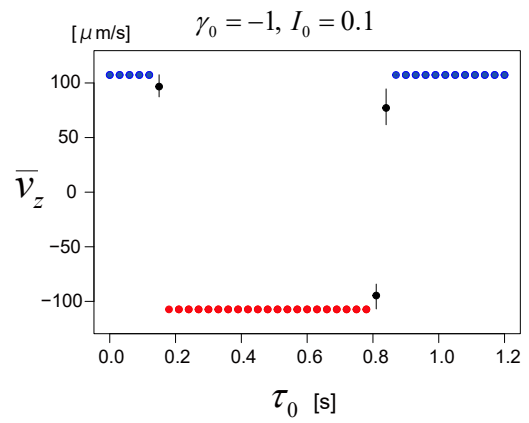

Fig. 6 Sign-switching of phototaxis in a slow-swimming mutant in the mathematical model.

*Cis*-dominant strain

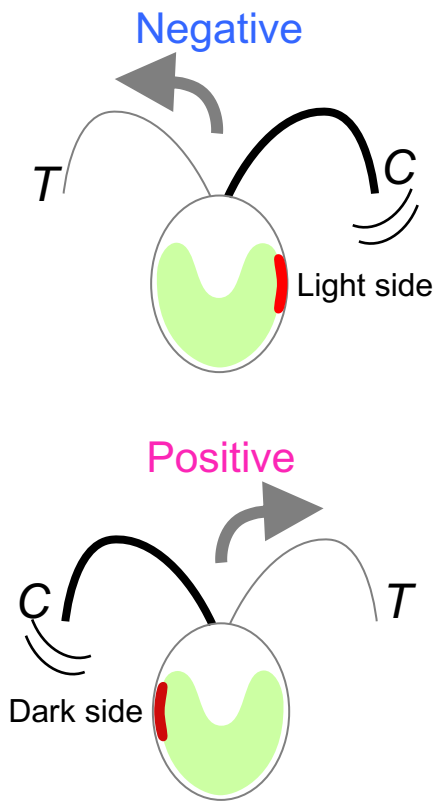

*Trans*-dominant strain

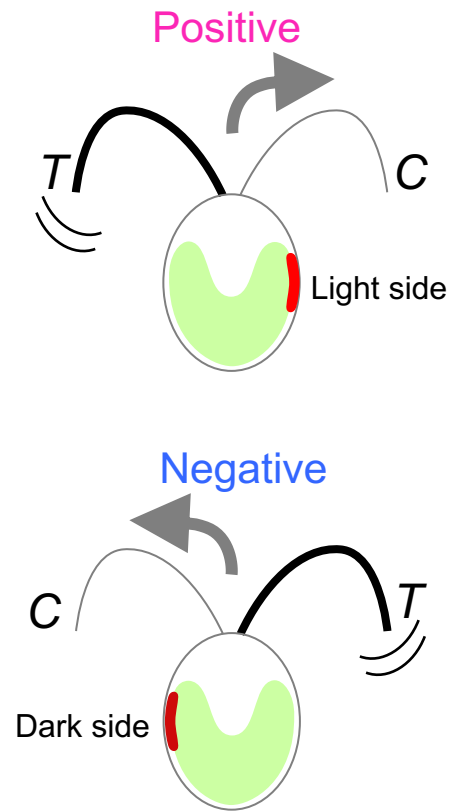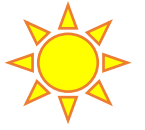

Fig. 7 Schematic model of sign-reversal in phototaxis suggested by this study.
